# Supplementary material for: Prevalencia del estilo atencional en la población catalana de tenistas
Source: MDPI journal article supplement (doi:10.3390/ijms23010566), 1996-01-01
Supplement: s1 [file s1]

## In liver

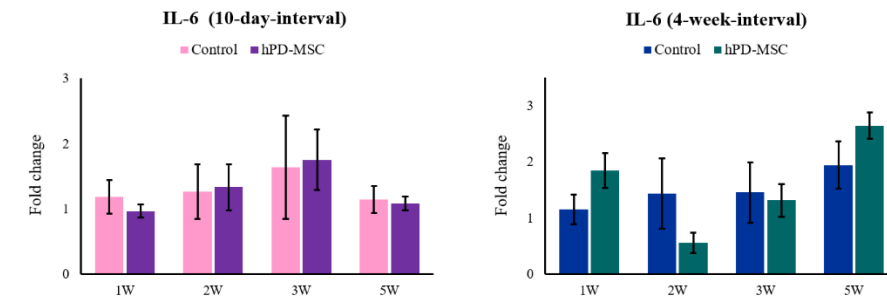

## In ovary

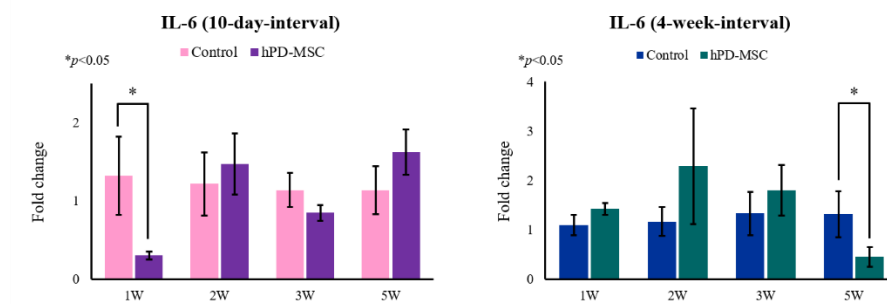

**Supplementary Figure S1.** hPD-MSC therapy did not trigger the immune response in aged rats. IL-6 expression in the liver was not significantly different between the control and therapy groups. In the ovary, the levels of IL-6 markedly decreased 1 week after hPD-MSC therapy at 10-day intervals and 5 weeks after hPD-MSC therapy at 4-week intervals. The data are presented as the mean  $\pm$  SEM. The asterisk represents statistical significance at  $p < 0.05$ . Control, PBS-injected group; hPD-MSCs, multiple-injection hPD-MSC therapy group.

**Supplementary Table S2.** Primer sequences and RT-PCR conditions.

| Gene Symbol   | Description                          | Accession Number | Primer Sequence <sup>a</sup>                                |
|---------------|--------------------------------------|------------------|-------------------------------------------------------------|
| <i>Ddc</i>    | Dopa decarboxylase                   | NM_001270853.1   | For-TTTTGACTGCTCTGCCATGT<br>Rev-TGAGACAGCTTCACGTGCTT        |
| <i>Hgf</i>    | Hepatocyte growth factor             | NM_017017.2      | For-TGGACCTGAAGGCTCAGATT<br>Rev-TGGTGCTGACTGCATTCTC         |
| <i>Htr2a</i>  | 5-Hydroxytryptamine receptor 2a      | NM_017254.1      | For-GTCCATCAGCAATGAGCAAA<br>Rev-TGGATTGACAGCTGAGGAGA        |
| <i>Tph1</i>   | Tryptophan hydroxylase 1             | NM_001100634.3   | For-AAGATGGGCAGCTGAGAGTC<br>Rev-CGGTTTTTGGCAAATTCTCTC       |
| <i>Vegfa</i>  | Vascular endothelial growth factor a | NM_031836        | For-ATCTTCAAGCCGTCCTGTGT<br>Rev-GCTGCAGGAAGCTCATCTCT        |
| <i>AluYb8</i> |                                      |                  | For-CGAGGCGGGTG-<br>GATCATGAGGT<br>Rev- TCTGTGCCCCAGCCGGACT |

<sup>a</sup> For, forward; Rev, reverse.
